# Supplementary material for: Hollow structure molecularly imprinted ratiometric fluorescence sensor for the selective and sensitive detection of dopamine
Source: Royal Society of Chemistry journal article supplement (doi:10.1039/d3an00528c), 2023-01-01
Supplement: d3an00528c1.pdf [file d3an00528c1.pdf]

## Supporting information

### Characterizations

The optical properties of the prepared materials were evaluated by Cary Eclipse spectrofluorometer. Besides, multiple techniques including scanning electron microscopy (SEM, Hitachi S-4800), transmission electron microscopy (TEM, JEM-2100), X-ray photoelectron spectroscopy (XPS, HI5700ESCA), X-ray diffraction (XRD, Rigaku D/max-2500 X-ray diffractometer), Fourier-transform infrared (FT-IR, Nicolet NEXUS-470) and volumetric adsorption analyzer (JW-BK 132F) were used to characterize the fabricated samples.

Table S1 The proportion of functional monomer, template molecule and crosslinker to prepare CdTe@H-ZIF-8/CDs@MIPs.

| Sample                      | AM<br>(mmol) | VPBA<br>(mmol) | DA<br>(mmol) | MBAAM<br>(mmol) |
|-----------------------------|--------------|----------------|--------------|-----------------|
| CdTe@H-ZIF-8/CDs@MIPs-<br>1 | 0.02         | 0.02           | 0.04         | 0.09            |
| CdTe@H-ZIF-8/CDs@MIPs-<br>2 | 0.08         | 0.08           | 0.04         | 0.36            |
| CdTe@H-ZIF-8/CDs@MIPs-<br>3 | 0.16         | 0.06           | 0.04         | 0.72            |

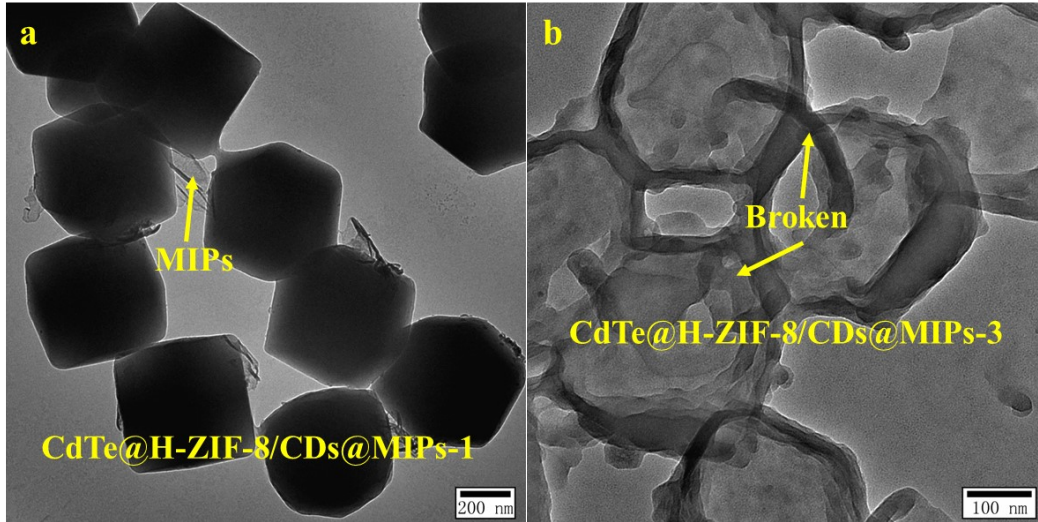

Fig. S1 The TEM images of CdTe@H-ZIF-8/CDs@MIPs-1 (a) and CdTe@H-ZIF-8/CDs@MIPs-3 (b)

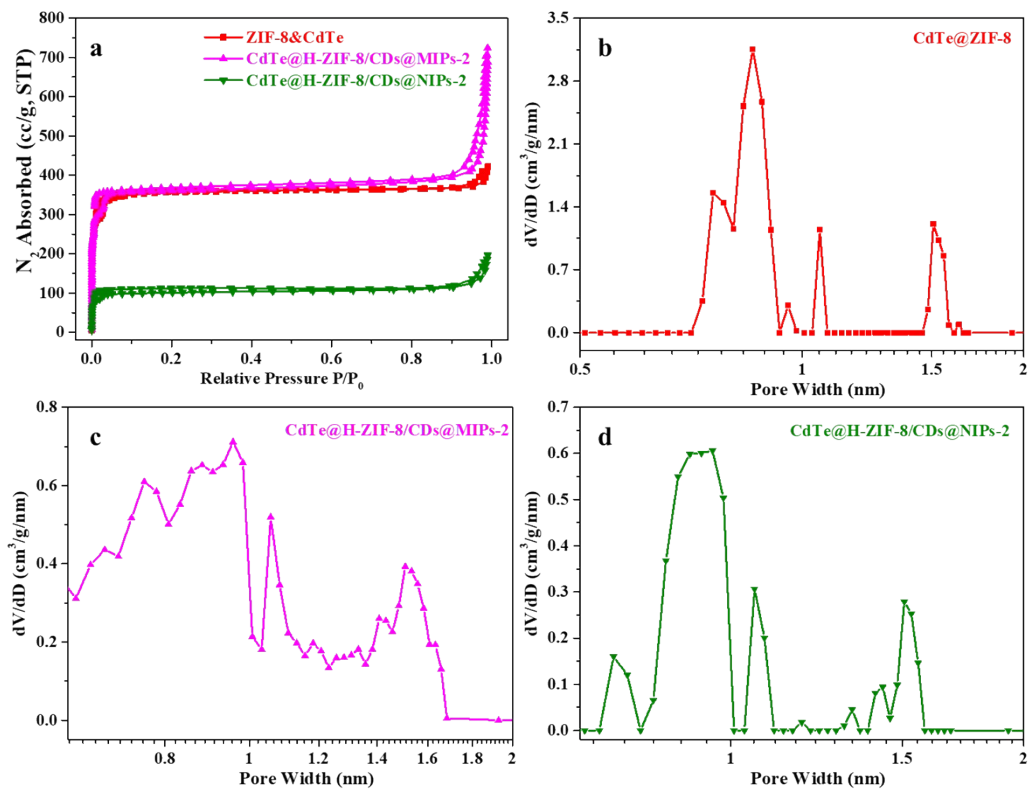

Fig. S2 N<sub>2</sub> adsorption-desorption isotherm (a) and the corresponding pore size distributions (b) of different samples

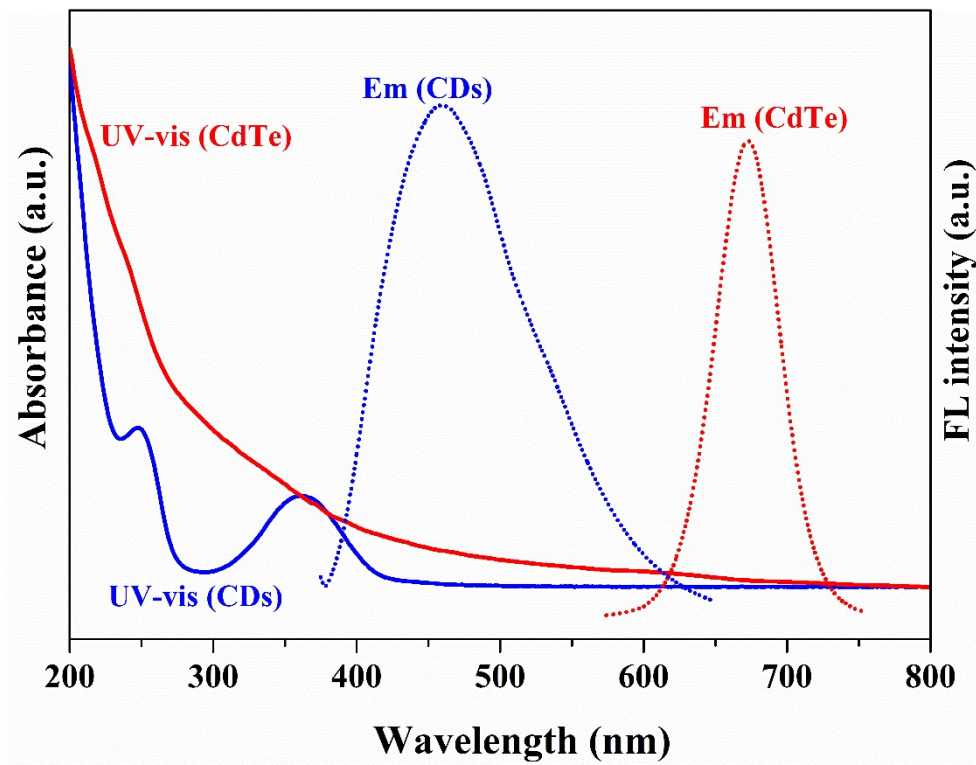

Fig. S3 The absorption spectra and emission spectra of CDs and CdTe QDs

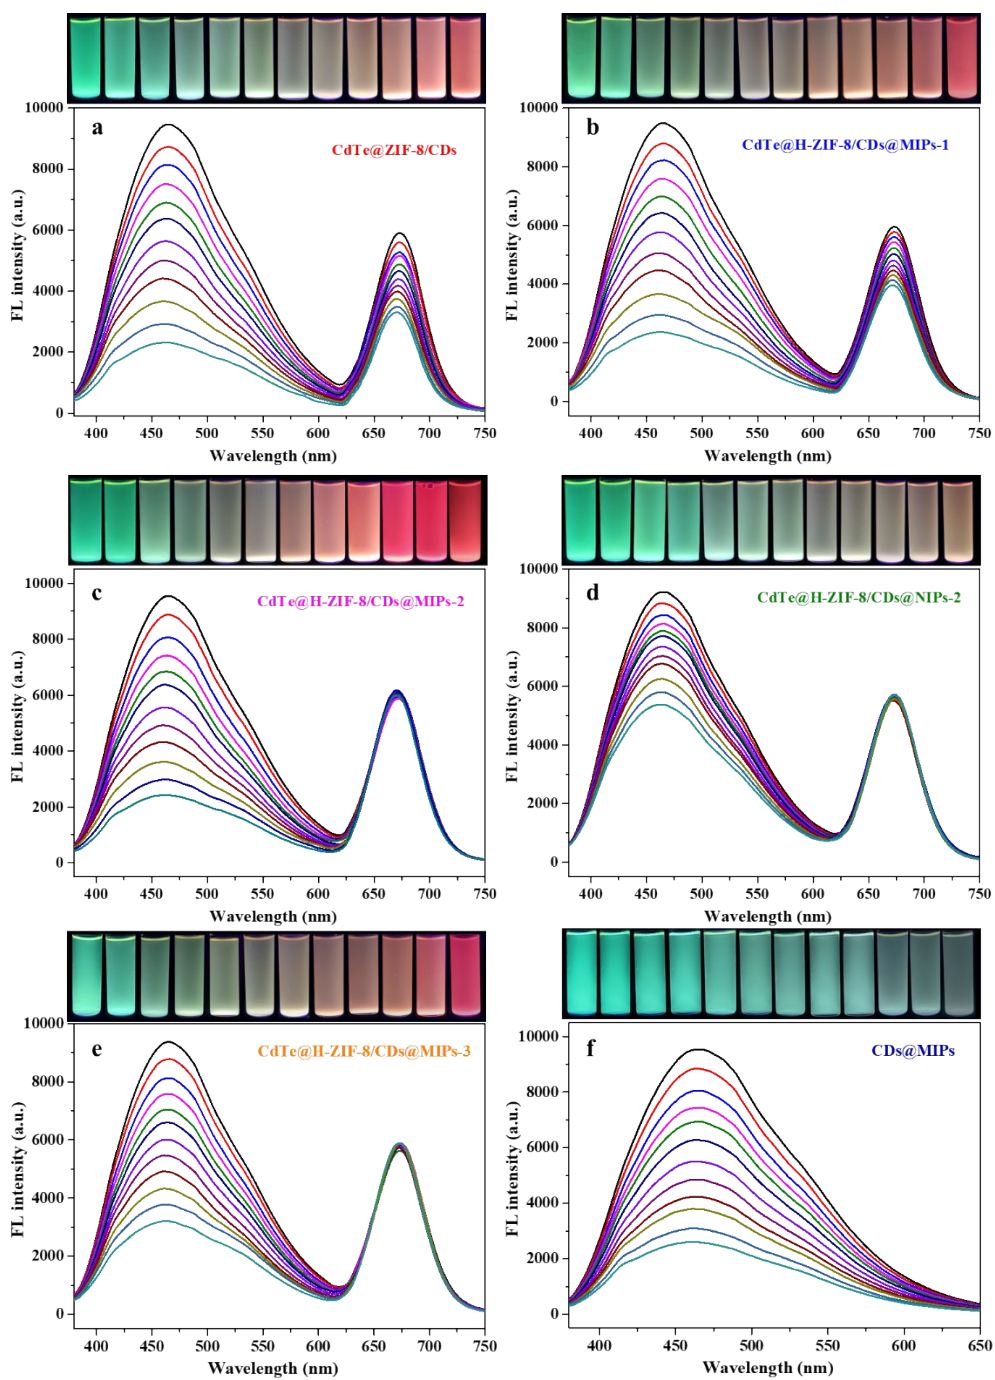

Fig. S4 Fluorescence spectra of fluorescence sensor with different concentration of DA and corresponding fluorescent photos under UV lamp (a-f)

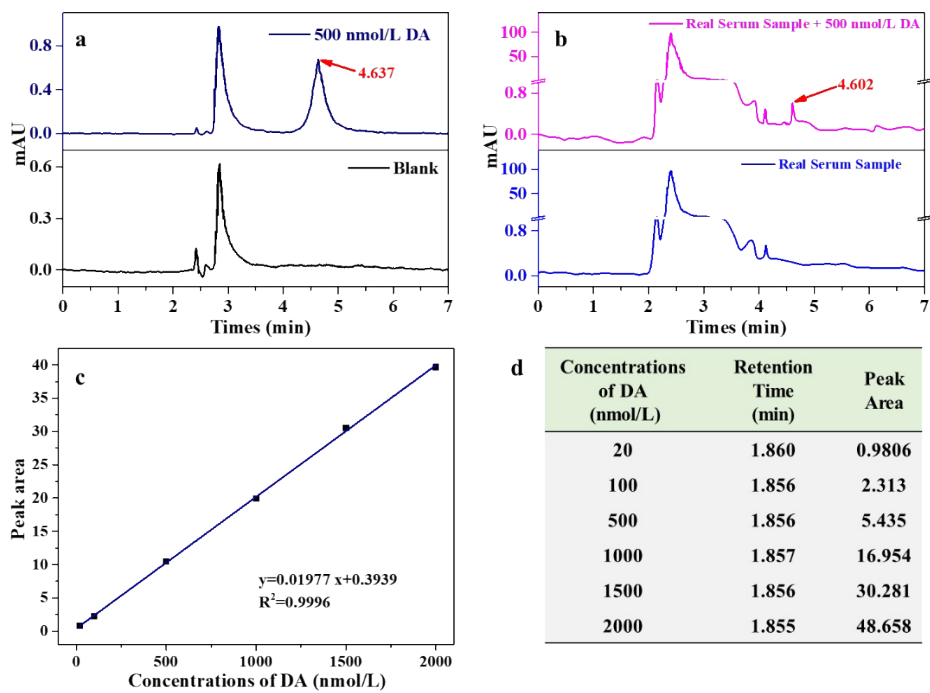

Fig. S5 Chromatogram of HPLC: (a) standard blank and 500 nM DA standard solution, (b) Serum sample blank and serum sample spiked with 500 nM DA standard solution. (c) DA standard curve, (d) DA standard concentration and its corresponding retention time and peak area

Table S2 The corresponding linear equation and detection limit of fluorescence sensor

| Sample                  | Linear equation                                                                           | R <sup>2</sup> | LOD<br>(nM) |
|-------------------------|-------------------------------------------------------------------------------------------|----------------|-------------|
| CdTe@ZIF-8/CDs          | $-\log[(I_{464}/I_{673})/(I_{464}/I_{673})_0]=$<br>$5.59002 \times 10^{-4} [c] - 0.00709$ | 0.97928        | 75.67       |
| CdTe@H-ZIF-8/CDs@MIPs-1 | $-\log[(I_{464}/I_{673})/(I_{464}/I_{673})_0]=$<br>$6.95518 \times 10^{-4} [c] - 0.00304$ | 0.98809        | 50.10       |
| CdTe@H-ZIF-8/CDs@MIPs-2 | $-\log[(I_{464}/I_{673})/(I_{464}/I_{673})_0]=$<br>$1.02 \times 10^{-3} [c] + 0.00998$    | 0.99745        | 12.35       |
| CdTe@H-ZIF-8/CDs@NIPs-2 | $-\log[(I_{464}/I_{673})/(I_{464}/I_{673})_0]=$<br>$3.90119 \times 10^{-4} [c] + 0.01483$ | 0.98704        | 96.06       |
| CdTe@H-ZIF-8/CDs@MIPs-3 | $-\log[(I_{464}/I_{673})/(I_{464}/I_{673})_0]=$<br>$7.80416 \times 10^{-4} [c] + 0.01899$ | 0.992          | 39.13       |
